# Supplementary material for: Characteristics and Clinical Outcome of Lyme Neuroborreliosis in a High Endemic Area, 1995–2014: A Retrospective Cohort Study in Denmark
Source: Oxford University Press journal article supplement (doi:10.1093/cid/cix568), 2017-06-26
Supplement: cix568_suppl_Supplementary_material_Borrelia_assay_description.doc [file cix568_suppl_Supplementary_material_Borrelia_assay_description.doc]

**SUPPLEMENTARY DATA ON *BORRELIA* ANTIBODY ASSAYS**

*CSF Borrelia AI*

The IDEIA Lyme Neuroborreliosis test (Oxoid, Hampshire, UK) was used for detection of intrathecal synthesis of *Borrelia* specific antibodies throughout the study period [1,2].

Diluted, paired CSF and serum specimens were added to micro wells coated with antibodies specific to either human IgG or IgM. After washing, biotinylated native *B. afzelii* flagella DK1 strain complexed with peroxidase-conjugated streptavidin was added. After washing, addition of tetramethylbenzidin (TMB), incubation and addition of stop-reagent, the optical density (OD) was measured. The index was calculated as ODCSF/ODserum*(ODCSF - ODserum) for IgG and IgM, respectively. Only index values ≥ 0.3 in combination with ODCSF ≥ 0.15 were regarded as positive.

The compartment-specific dilution of CSF and serum in the assay ensures that the anti-human IgG and IgM capture antibodies are saturated with either CSF Ig or serum Ig. The result is that this assay measures the ratio between the proportions of antibodies specific for *Borrelia* in each compartment, and not the ratio between the concentrations of *Borrelia* antibodies.

*Borrelia specific antibodies in serum*

For the detection of *Borrelia* specific IgG and IgM antibodies in serum, IDEIA *Borrelia burgdorferi* IgG and IgM (Oxoid, Hampshire, UK) was used between 1995 and 2010 [3,4]. The IgG assay was an ELISA where the wells were coated with purified native *B. afzelii* DK1 strain flagellum as antigen to bind *Borrelia* specific antibodies in patient serum, and peroxidase-conjugated anti-human IgG antibodies was used as conjugate to detect the bound IgG. The IgM assay was a µ-capture ELISA, where the wells were coated with antibodies specific to human IgM. The *Borrelia*-specific antibodies of the captured IgM in the sample were detected with biotinylated native *B. afzelii* DK1 strain flagella complexed with peroxidase-conjugated streptavidin using TMB as substrate.

Siemens Enzygnost Lyme link VlsE/IgG and Enzygnost Borreliosis/IgM (Siemens, Marburg, Germany) was used from 2011 [5,6]. The IgG assay was an ELISA where the wells were coated with extracted antigens from *B. afzelii* PKo strain and with recombinant VlsE from *B. afzelii*, *B. garinii* and *B. burgdorferi sensu stricto*. The bound *Borrelia*-specific IgG from the sample was detected with peroxidase-conjugated anti-IgG using TMB as substrate. The IgM assay was an ELISA, where the sample was pre-treated with anti-human IgG from sheep to remove the patients IgG, before analyzing in wells coated with extracted antigens from *B. afzelii* PKo strain. The *Borrelia*-specific IgM antibodies were detected with peroxidase-conjugate anti-human IgM from goats using TMB as substrate.

References

1. Package insert IDEIA Lyme Neuroborreliosis: <https://www.e-labeling.eu/TSMX7840> (accessed May 9th 2017)
2. Hansen K, Lebech AM. Lyme neuroborreliosis: a new sensitive diagnostic assay for intrathecal synthesis of *Borrelia burgdorferi*–specific immunoglobulin G, A, and M. Ann Neurol, **1991**; 30: 197-205.
3. Package insert IDEIA TM *Borrelia burgdorferi* IgG: <http://tools.thermofisher.com/content/sfs/manuals/X7841.pdf> (accessed May 9th 2017)
4. Package insert IDEIA TM *Borrelia burgdorferi* IgM: <https://tools.thermofisher.com/content/sfs/manuals/X7842.pdf> (accessed May 9th 2017)
5. Package insert Enzygnost® Lyme link VlsE/IgG, Siemens.
6. Package insert Enzygnost® Borreliosis/IgM, Siemens.
