# Supplementary material for: Characteristics and Clinical Outcome of Lyme Neuroborreliosis in a High Endemic Area, 1995–2014: A Retrospective Cohort Study in Denmark
Source: Oxford University Press journal article supplement (doi:10.1093/cid/cix568), 2017-06-26
Supplement: cix568_suppl_Supplementary_material_Figure_2_legend.doc [file cix568_suppl_Supplementary_material_Figure_2_legend.doc]

**Figure 2.** The treatment delay, from debut of symptoms to initiation of antibiotic treatment, for 377 patients with Lyme neuroborreliosis, divided into five year intervalls. The lower adjacent value here represents 0%, the box plot represents the 25th, 50th and 75th percentile, respectively, and the upper adjacent value represents 2/3 of the length of the box. Extreme outliers (> 90th percentile, treatment delay > 161 days) have been excluded (n=41). The red line represents the overall median treatment delay of 22 days (IQR 28 days).
